# Supplementary material for: RETRACTED: Actively Targeted Nanodelivery of Echinomycin Induces Autophagy-Mediated Death in Chemoresistant Pancreatic Cancer In Vivo
Source: MDPI journal article supplement (doi:10.3390/cancers12082279), 2020-08-14

## Supplemental Data

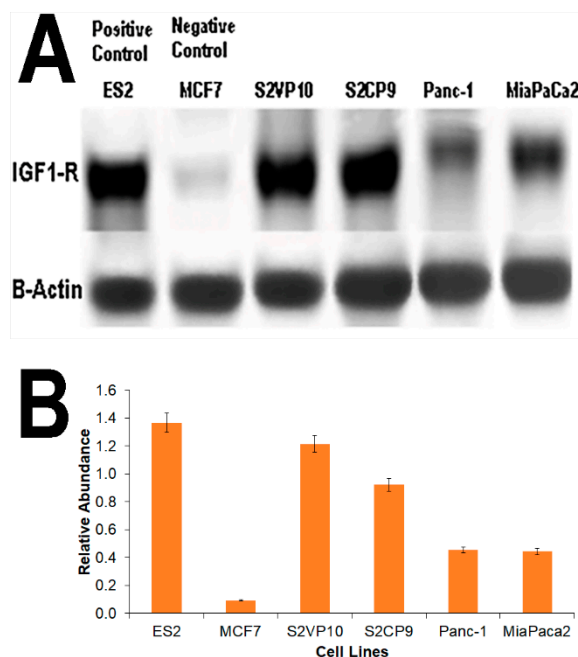

**Figure S1:** Western blot shows relative levels of Insulin like growth factor 1-receptor (IGF1-R) in pancreatic cancer cell lines. (A) Western blot was quantified (B) for IGF1-R and B-actin (control). Positive control was ES2 and negative (low expressing) control was MCF7.

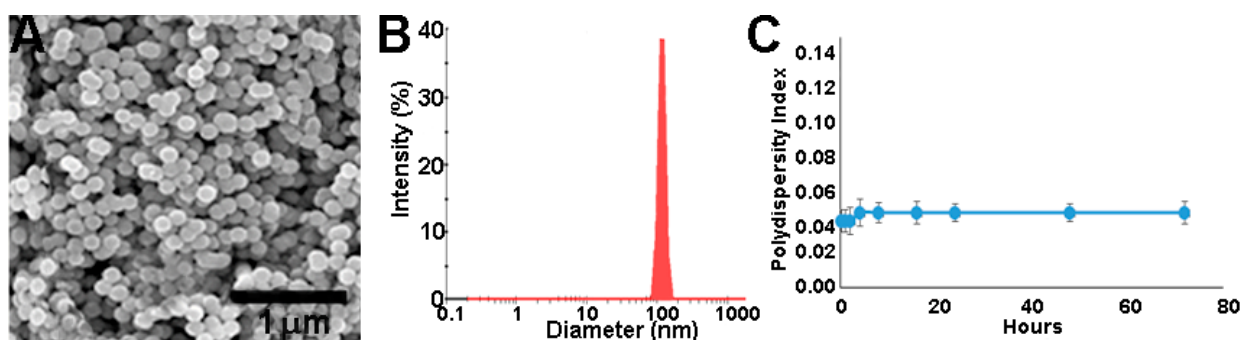

**Figure S2:** Characterization of Liposomes. (A) The synthesized liposomes were characterized by Scanning Electron Microscopy (SEM) (B) Dynamic Light Scattering (DLS), and (C) polydispersity index was measured. SEM analysis determined the average liposome particle diameter  $111 \text{ nm} \pm 6.1 \text{ nm}$ . The further characterization by DLS determined the average diameter  $129 \text{ nm} \pm 6.4 \text{ nm}$  with the uniform (0.04–0.05) polydispersion index (PDI) values.

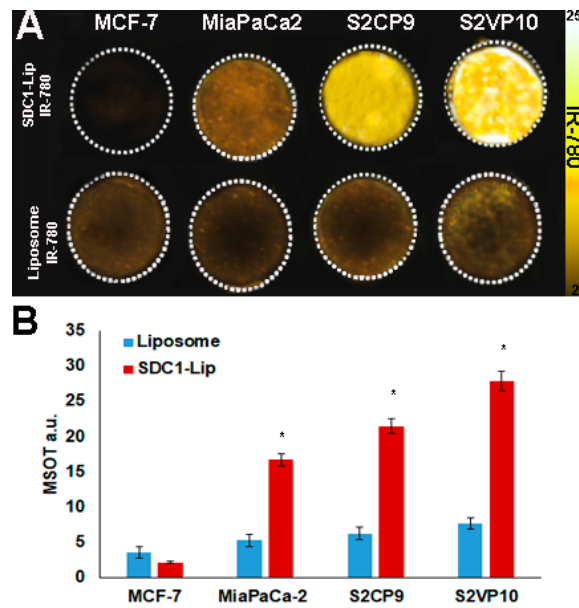

**Figure S3:** Tissue mimicking phantoms indicate relative level of SDC1-Lip uptake in IGF1-R low (MCF7) and pancreatic cells. Cells were plated in 6-well plates, treated with SDC1-Lip or untargeted liposome containing IR-780 dye as in flow cytometry. (A) Cell pellets were visualized using MSOT in tissue mimicking phantoms and quantified in (B) These results confirm the flow cytometry results indicating statistically significant increases SDC1-Lip in IGF-1R positive cells  $p < 0.05^*$ .

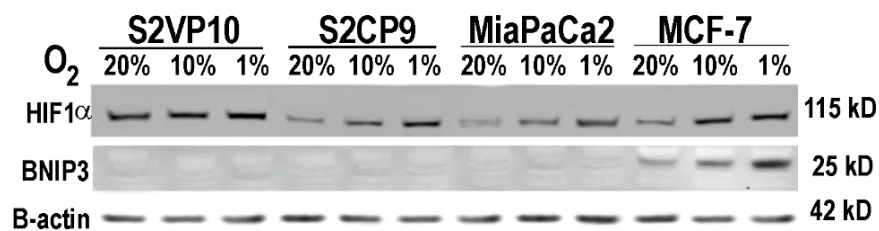

**Figure S4:** Evaluation of HIF1- $\alpha$  and BNIP3 expression in pancreatic cancer cell lines in normoxia and hypoxia. While S2VP10 exhibited chronic expression of HIF1- $\alpha$  in normoxia and hypoxia, both S2CP9 and MiaPaCa2 cell lines expressed HIF1- $\alpha$  with decreasing O<sub>2</sub>. None of the pancreatic cancer cell lines tested expressed BNIP3 under normoxia or hypoxia conditions. MCF-7 (control) increased expression of both HIF1- $\alpha$  and BNIP3 with decreasing O<sub>2</sub> levels.

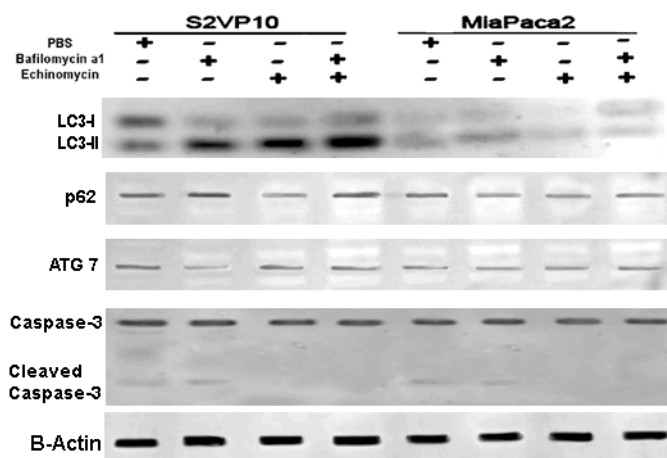

**Supplemental Figure 5:** Evaluation of Bafilomycin a1 combined with Echinomycin in pancreatic cancer cells. Similarly to the experiments and western blots in Figure 3, S2VP10 and MiaPaCa2 cells were treated with 5 nM Bafilomycin a1, 1 nM Echinomycin, or combination. Western blots demonstrate increased autophagy as demonstrated by increased LC3-II in both Bafilomycin a1 control

samples as well as Echinomycin treated samples and combination. The combination of the lysosomal inhibitor Bafilomycin A1 with Echinomycin further increased LC3 lipidation levels upon combination treatment with compared with either agent alone, indicating that the enhanced LC3 lipidation was due to induced autophagosome biogenesis, and not a block in autophagosome clearance. Furthermore, this increase in LC3-II without increase in cleaved caspase-3 supports the mechanism of cell death as autophagy without apoptosis.

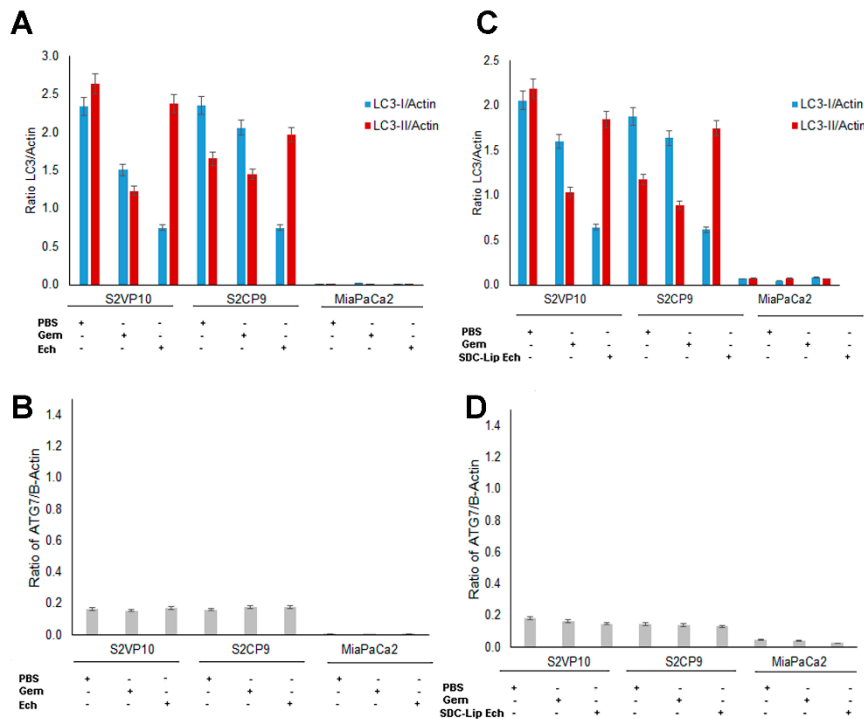

**Figure S6:** Dosimetry of western blots containing CL3-I, -II, and ATG 7 data from Figure 3. (A) Western blot dosimetry of LC3-I and LC3-II (B) ATG7 from cells treated with Echinomycin or Gemzar. (C) Western blot dosimetry of LC3-I and LC3-II (D) ATG7 from cells treated with SDC-Lip Echinomycin or Gemzar.

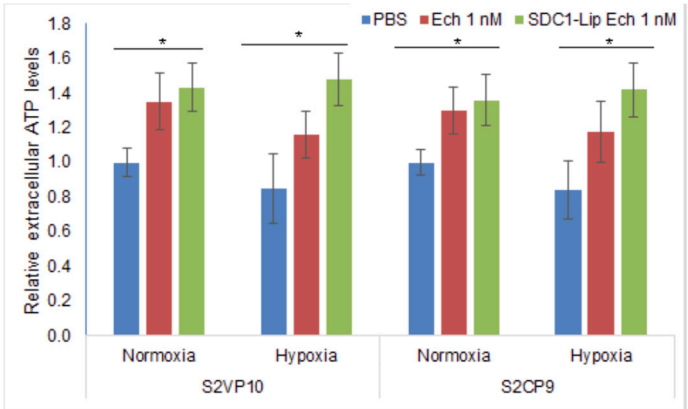

**Figure S7:** Assessment of extracellular ATP levels of S2VP10 and S2CP9 under normoxia and hypoxia following Echinomycin or SDC1-Echinomycin treatment. Cells were treated with 1nM of either free drug or the targeted liposomal drug formulation. After 24 h, the cell culture media (with any floating cells removed via centrifugation) was removed and ATP was measured using the ATPlite assay without including the cell lysate. The results of the assay were normalized to PBS normoxia treatment. The ATPlite assay demonstrated increased extracellular ATP levels in response to Echinomycin treatment in normoxia and hypoxia in S2VP10 and S2CP9. Statistical analysis was conducted via ANOVA with significance  $p < 0.05$  indicated by a \*.

Western blot data

Figure 3A western blots

Dosimetry

|                  | S2VP10 |        |        | S2CP9  |        |        | MiaPaCa2 |        |        |
|------------------|--------|--------|--------|--------|--------|--------|----------|--------|--------|
| PBS              | +      | -      | -      | +      | -      | -      | +        | -      | -      |
| Gem              | -      | +      | -      | -      | +      | -      | -        | +      | -      |
| ECH              | -      | -      | +      | -      | -      | +      | -        | -      | +      |
| LC3-I            | 78.538 | 53.838 | 25.268 | 87.638 | 71.432 | 25.798 | 0.038    | 0.755  | 0.19   |
| LC3-II           | 88.602 | 43.888 | 79.976 | 61.606 | 50.21  | 68.239 | 0.365    | 0.323  | 0.269  |
| ATG7             | 5.492  | 5.504  | 5.79   | 5.965  | 6.171  | 6.174  | 0.087    | 0.033  | 0.127  |
| ATG12            | 6.676  | 8.762  | 30.647 | 6.359  | 5.895  | 25.617 | 0.533    | 1.177  | 0.264  |
| p62              | 44.807 | 47.992 | 35.653 | 43.3   | 45.845 | 32.304 | 23.284   | 21.826 | 22.274 |
| Caspase 3        | 11.872 | 4.099  | 14.388 | 3.494  | 6.525  | 12.726 | 5.961    | 1.375  | 4.79   |
| Cleaved<br>Casp3 | 0.999  | 7.605  | 0.214  | 0.208  | 8.389  | 0.35   | 1.288    | 10.5   | 1.23   |
| Caspase 9        | 38.202 | 11.245 | 49.694 | 28.765 | 12.515 | 16.967 | 36.99    | 14.947 | 40.367 |
| Cleaved<br>Casp9 | 0.169  | 5.912  | 0.267  | 1.082  | 14.464 | 0.695  | 1.196    | 27.395 | 1.354  |

Whole blots forLC3-I/II, ATG7, p62

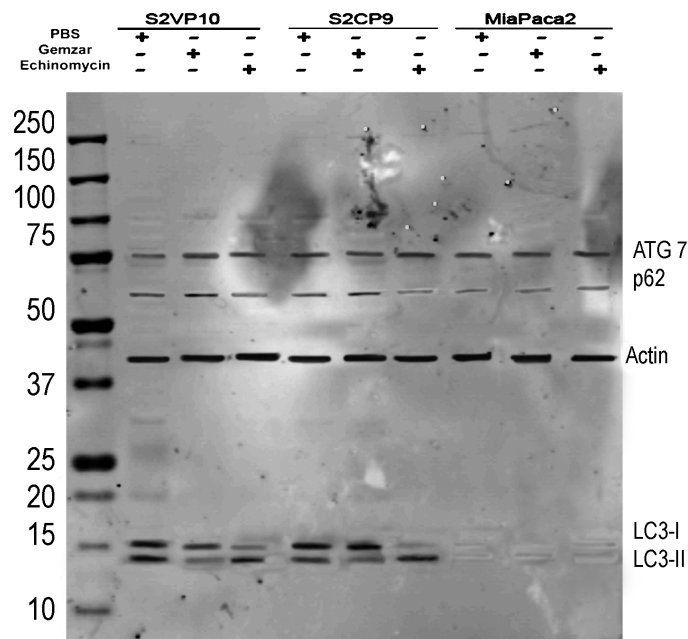

ATG 12-5

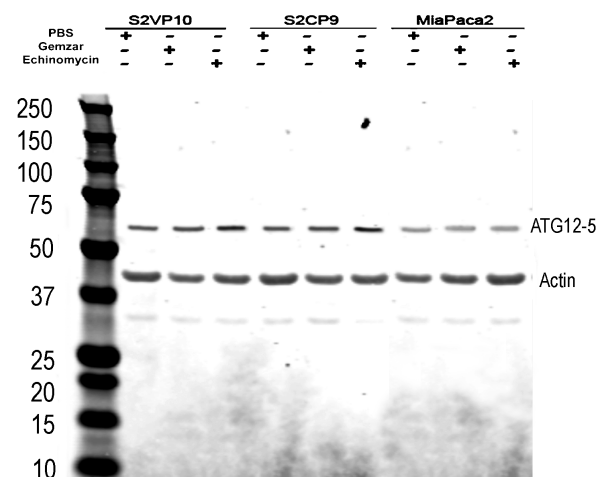

### Caspase 3

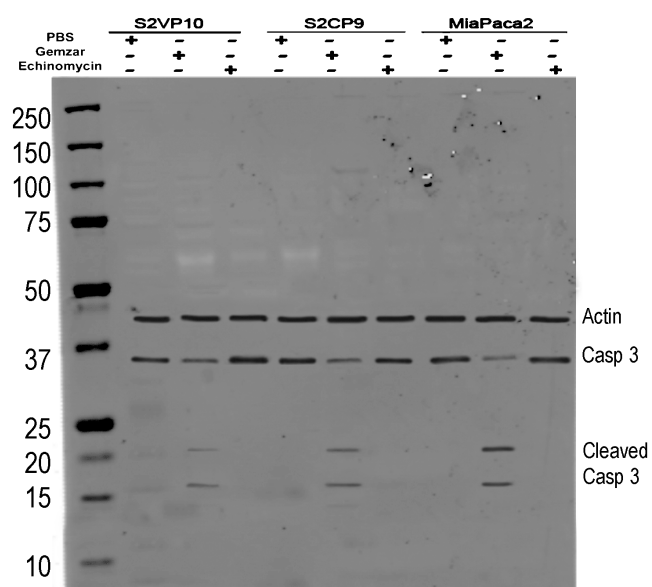

### Caspase 9

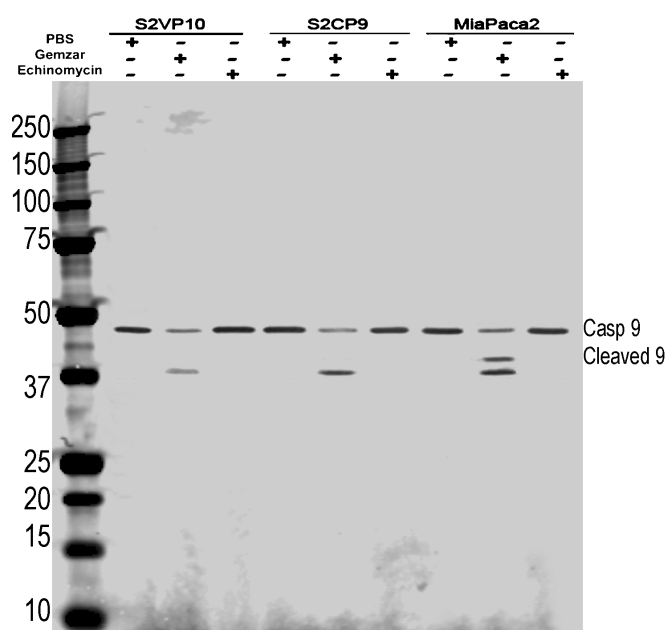

Figure 3B Western Blots

Dosimetry

|                | S2VP10 |        |        | S2CP9  |        |        | MiaPaCa2 |        |        |
|----------------|--------|--------|--------|--------|--------|--------|----------|--------|--------|
| PBS            | +      | -      | -      | +      | -      | -      | +        | -      | -      |
| Gem            | -      | +      | -      | -      | +      | -      | -        | +      | -      |
| SDC1-lip-ECH   | -      | -      | +      | -      | -      | +      | -        | -      | +      |
| LC3-I          | 86.963 | 66.363 | 27.654 | 81.318 | 73.679 | 26.061 | 2.975    | 1.791  | 3.447  |
| LC3-II         | 92.479 | 43.030 | 79.289 | 50.995 | 39.982 | 74.087 | 3.240    | 3.059  | 2.913  |
| ATG7           | 7.773  | 6.857  | 6.289  | 6.285  | 6.231  | 5.576  | 1.998    | 1.642  | 1.088  |
| ATG12          | 16.006 | 16.731 | 21.576 | 8.045  | 10.106 | 12.794 | 0.215    | 4.508  | 3.501  |
| p62            | 42.081 | 45.091 | 28.979 | 43.081 | 45.081 | 29.634 | 19.663   | 20.724 | 20.071 |
| Caspase 3      | 4.825  | 2.823  | 13.603 | 9.692  | 2.006  | 10.106 | 12.624   | 2.087  | 15.04  |
| Cleaved Casp 3 | 0.156  | 5.905  | 0.289  | 0.687  | 5.728  | 0.343  | 3.281    | 16.165 | 0.010  |
| Caspase 9      | 25.89  | 24.55  | 34.841 | 44.495 | 10.798 | 44.425 | 39.078   | 15.655 | 38.017 |
| Cleaved Casp 9 | 0.151  | 13.911 | 1.373  | 4.714  | 20.254 | 5.367  | 2.572    | 38.195 | 3.095  |

Whole blots forLC3-I/II, ATG7, p62

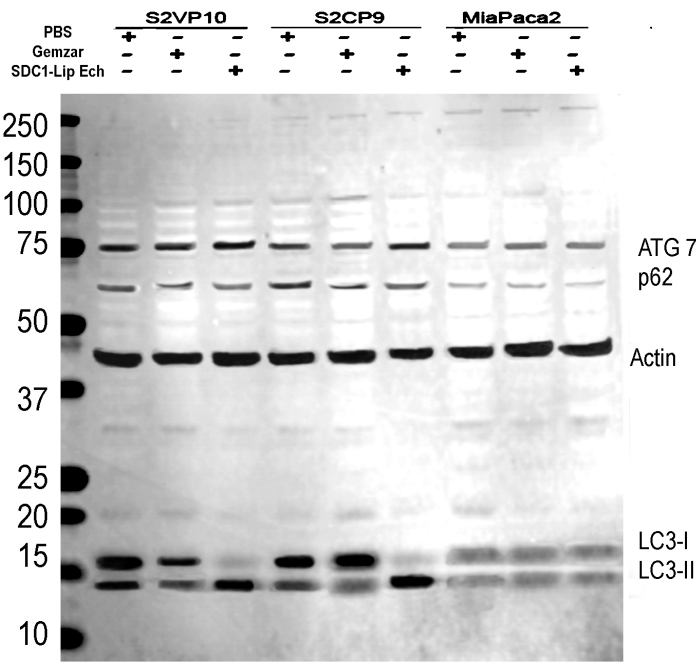

ATG 12-5

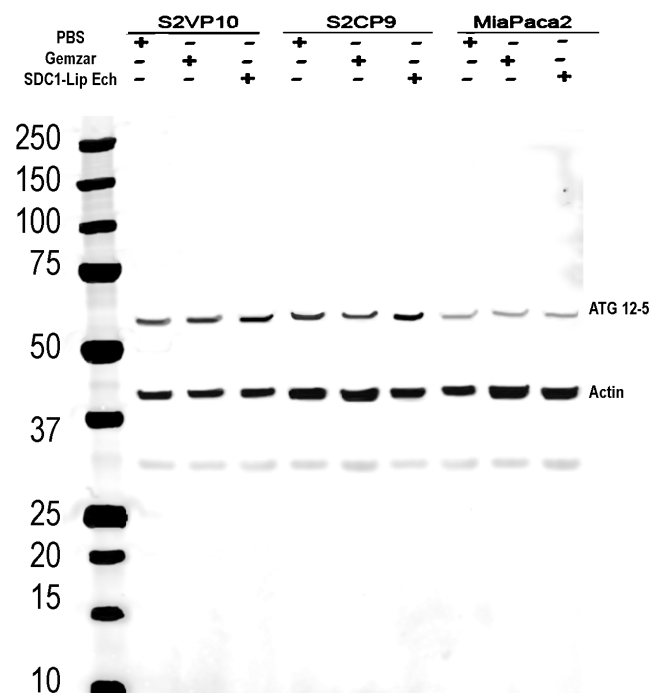

### Caspase 3

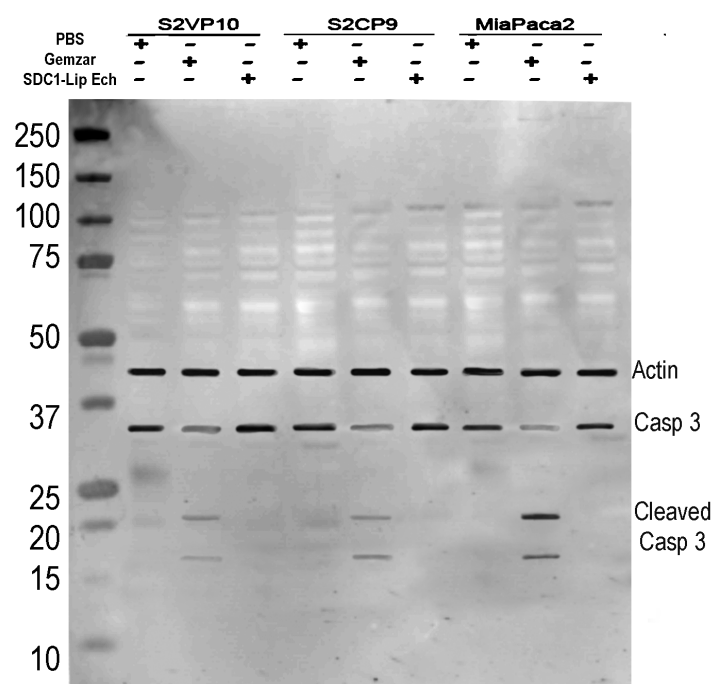

### Caspase 9

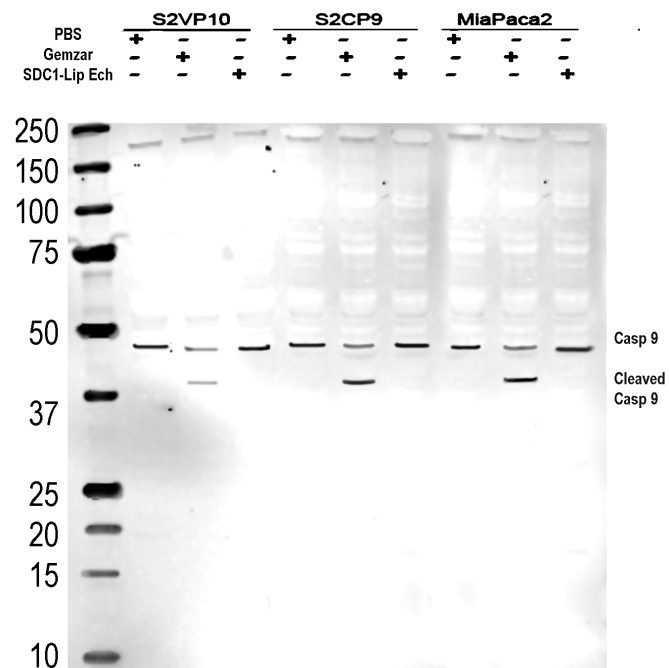

Figure 6 Whole Western Blots (2).

| Fig 6          | S2VP10  |         |         |              | S2CP9   |         |         |              |
|----------------|---------|---------|---------|--------------|---------|---------|---------|--------------|
|                | Cont    | Gem     | Ech     | SDC1-Lip Ech | Cont    | Gem     | Ech     | SDC1-Lip Ech |
| LC3-I          | 154.791 | 123.238 | 10.125  | 16.332       | 142.228 | 174.461 | 28.523  | 24.045       |
| LC3-II         | 180.152 | 156.716 | 160.974 | 165.821      | 125.821 | 70.089  | 79.101  | 127.378      |
| Caspase 3      | 100.684 | 59.132  | 117.859 | 150.451      | 122.202 | 81.679  | 153.423 | 178.291      |
| Cleaved Casp 3 | 64.645  | 101.065 | 5.112   | 1.953        | 27.700  | 143.982 | 6.919   | 6.512        |

Figure 6 autophagy blot

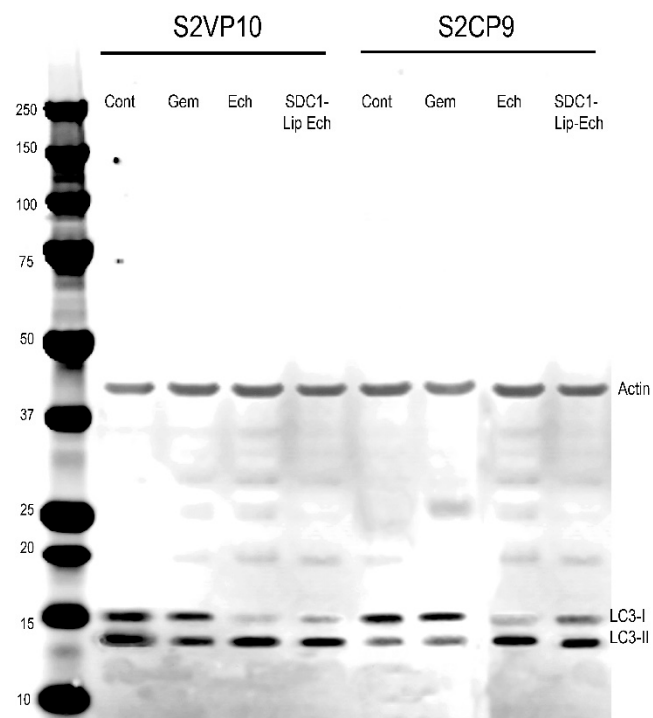



Figure 6 apoptosis blot

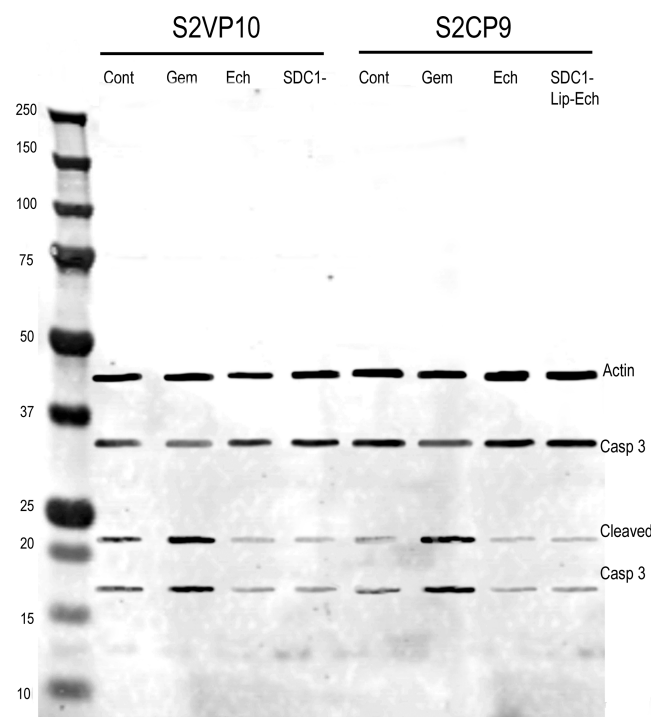

Supplemental Figure 1

Whole Western Blot

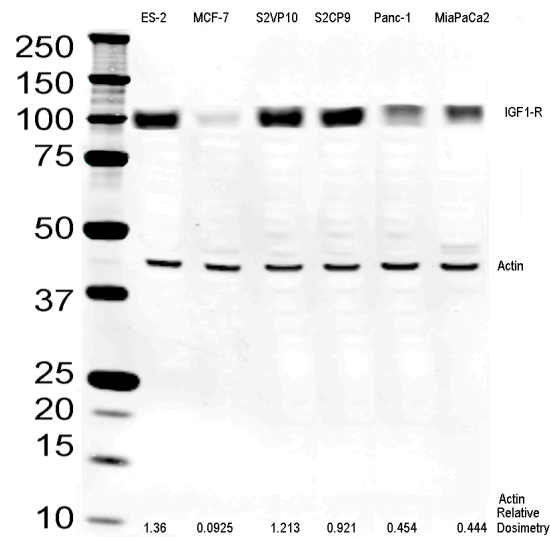

Supplemental Figure 4

| S2VP10 |         |         |         | S2CP9  |        |         | MiaPaCa2 |        |       | MCF-7  |        |        |
|--------|---------|---------|---------|--------|--------|---------|----------|--------|-------|--------|--------|--------|
| O2     | 20%     | 10%     | 1%      | 20%    | 10%    | 1%      | 20%      | 10%    | 1%    | 20%    | 10%    | 1%     |
| HIF1a  | 136.127 | 124.062 | 133.746 | 69.143 | 98.639 | 120.073 | 50.315   | 69.769 | 61.62 | 29.106 | 69.386 | 93.311 |
| BNIP3  | 1.334   | 1.297   | 1.366   | 0.978  | 1.674  | 1.646   | 1.257    | 1.431  | 1.327 | 34.479 | 43.363 | 58.899 |

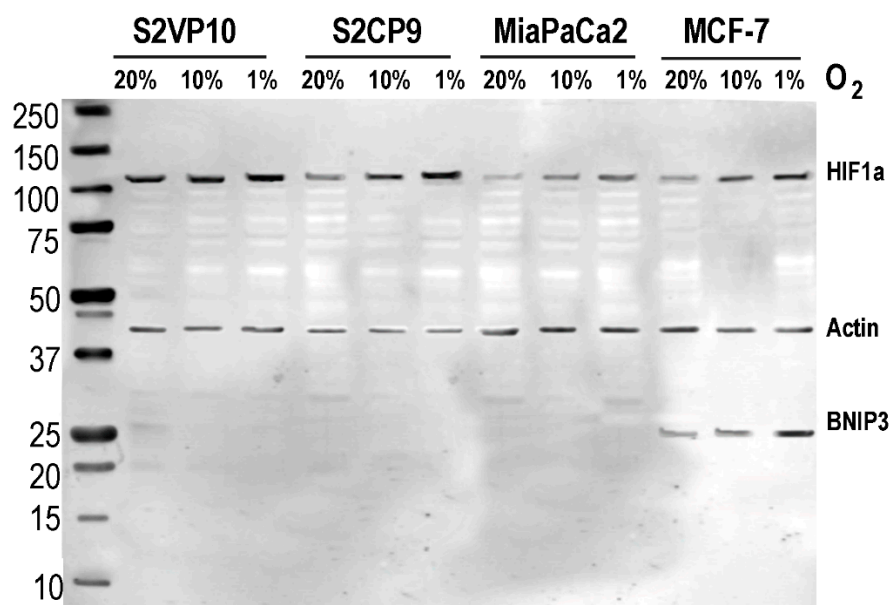

Supplemental Figure 5: 2 blots

Whole western blots Autophagy and Caspase 3

|                | S2VP10  |         |         |         | MiaPaCa2 |        |        |        |
|----------------|---------|---------|---------|---------|----------|--------|--------|--------|
| PBS            | +       | -       | -       | -       | +        | -      | -      | -      |
| Baf a1         | -       | +       | -       | +       | -        | +      | -      | +      |
| ECH            | -       | -       | +       | +       | -        | -      | +      | +      |
| LC3-I          | 108.358 | 64.55   | 43.451  | 34.638  | 52.59    | 49.753 | 37.225 | 55.693 |
| LC3-II         | 104.551 | 145.187 | 170.698 | 183.809 | 50.115   | 52.031 | 42.713 | 50.816 |
| ATG7           | 10.293  | 5.228   | 12.815  | 13.366  | 13.13    | 12.685 | 12.242 | 12.374 |
| p62            | 48.676  | 59.363  | 31.553  | 68.975  | 49.909   | 37.39  | 26.617 | 39.997 |
| Casp 3         | 25.954  | 22.807  | 21.219  | 17.992  | 18.712   | 12.399 | 13.727 | 16.909 |
| Cleaved Casp 3 | 1.2056  | 1.4351  | 0.102   | 0.619   | 1.405    | 1.384  | 0.13   | 0.997  |

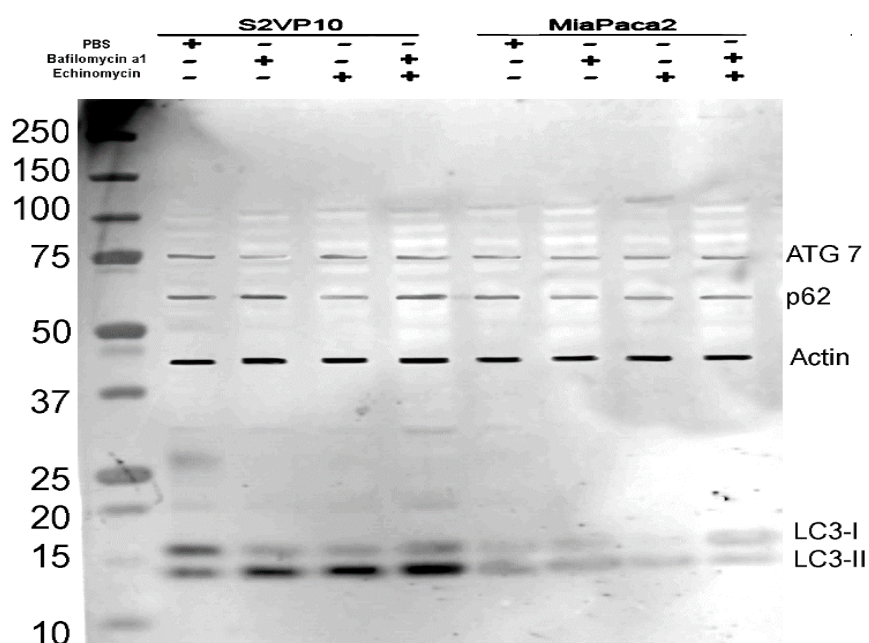

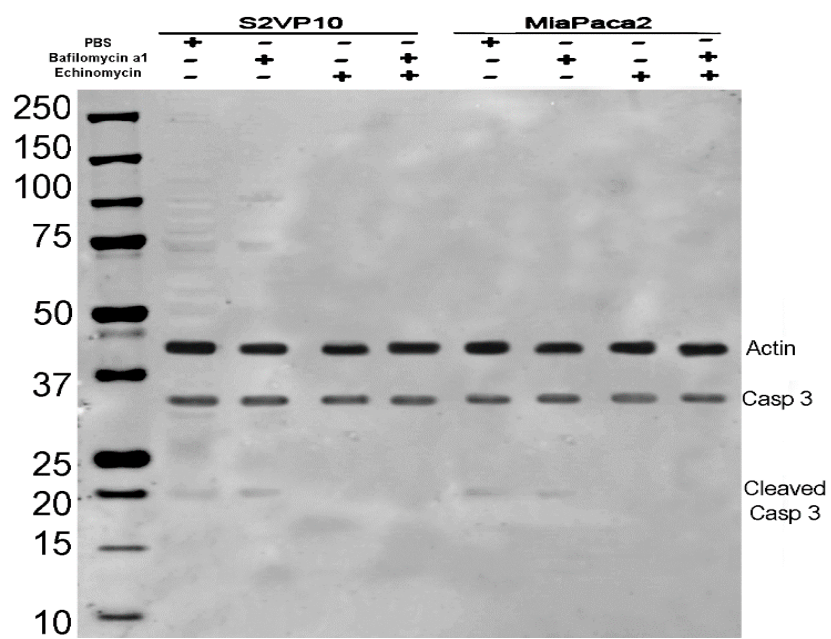

Supplement: s1 [file s1]
